# Supplementary material for: Compositional editing of extracellular matrices by CRISPR/Cas9 engineering of human mesenchymal stem cell lines
Source: eLife journal article supplement (doi:10.7554/elife.96941), 2024-05-13
Supplement: data1 [file elife-96941-data1-v1.zip]

## Sheet: Sheet1
					Undifferentiated cells																MSOD-B																MSOD-B ΔR1
				RUNX2	0.000466	0.000268	0.000216														0.000434	0.000542	0.000548														0.00011	0.000213	0.000112
					Undifferentiated cells																MSOD-B																MSOD-B ΔR1
				COLX	0.872539	0.121672	0.093922														0.195678	0.857789	2.58187														0	0	0
					Undifferentiated cells																MSOD-B																MSOD-B ΔR1
				ALPL	0.000192	0.000132	8.29e-05														0.007623	0.034674	0.16924														0.000174	0.00017	0.000155
