# Supplementary material for: Compositional editing of extracellular matrices by CRISPR/Cas9 engineering of human mesenchymal stem cell lines
Source: eLife journal article supplement (doi:10.7554/elife.96941), 2024-05-13
Supplement: data1 [file Figure 1C - Source data.xlsx]

## Sheet: Sheet1
			MSOD-B clones modified with gRNA
			MSOD-B	5000	5000
			1.1_1	1877.03	1846.45
			1.1_2	2864.33	2606.45
			1.1_3	4068.73	4234.2
			1.1_4	2465.86	2607.51
			1.1_5	3058.13	3152.12
			1.3_1	3340.37	3312.7
			1.3_2	1577.58	1577.45
			1.3_3	91.6076	99.2857
			1.3_4	2495.78	2333.61
			1.3_5	1201.62	1229.82
			1.3_6	115.171	102.066
			8.1_1	3332.29	3432.37
			8.1_2	4339.05	4339.05
			8.1_3	1463.34	1571.23
