# Supplementary material for: Compositional editing of extracellular matrices by CRISPR/Cas9 engineering of human mesenchymal stem cell lines
Source: eLife journal article supplement (doi:10.7554/elife.96941), 2024-05-13
Supplement: data1 [file Figure 1E - Source data.xlsx]

## Sheet: Sheet1
		MSOD-B												MSOD-BΔV1
		29.378	27.586	29.818	29.873	27.7248	22.9509	33.617	25.2206	25.3431	24.4118			28.725	31.784	20.02	10.7391	11.7391	14.058	12.4927	12.7101	15.1449	12.3188
