# Supplementary material for: Compositional editing of extracellular matrices by CRISPR/Cas9 engineering of human mesenchymal stem cell lines
Source: eLife journal article supplement (doi:10.7554/elife.96941), 2024-05-13
Supplement: data1 [file Figure 1F - Source data.xlsx]

## Sheet: Sheet1
			MSOD-B												MSOD-BΔV1
			592.963	493.333	540.185	584.444									29.2593	49.4444	49.0741	62.7778
