# Supplementary material for: Compositional editing of extracellular matrices by CRISPR/Cas9 engineering of human mesenchymal stem cell lines
Source: eLife journal article supplement (doi:10.7554/elife.96941), 2024-05-13
Supplement: data1 [file Figure 2 - supplement 2 - Source data.xlsx]

## Sheet: Sheet1
	2 Weeks		6 Weeks
	MSOD-B	MSOD-BΔV1	MSOD-B	MSOD-BΔV1
	1.72514	1.67612	3.3059	2.2772
	1.19459	0.768235	3.0511	1.42667
	1.61918	1.28507	3.6461	1.48983
	1.54595	0.695643	3.1654	2.81282
	1.74961	0.582782	3.6898	1.55973
	1.84617	1.47394	1.8544
		1.13763
