# Supplementary material for: Compositional editing of extracellular matrices by CRISPR/Cas9 engineering of human mesenchymal stem cell lines
Source: eLife journal article supplement (doi:10.7554/elife.96941), 2024-05-13
Supplement: data1 [file Figure 2 - supplement 3 - Source data.xlsx]

## Sheet: Sheet1
	2 Weeks		6 Weeks
	MSOD-B	MSOD-BΔV1	MSOD-B	MSOD-BΔV1
	9.2	5.4	14.8	12.4
	16	6.8	10.3	8.4
	12.6	14.5	18	14.6
	12.9	6.3	10.6	4.3
	12.6	7.4	17.1	13.3
	11.4	8.4	10.8	8.4
	8.8	7.1
	8.1	5
