# Supplementary material for: Compositional editing of extracellular matrices by CRISPR/Cas9 engineering of human mesenchymal stem cell lines
Source: eLife journal article supplement (doi:10.7554/elife.96941), 2024-05-13
Supplement: data1 [file Figure 2C - Source data.xlsx]

## Sheet: Sheet1
				MSOD-B	MSOD-BΔV1
				33.7907	22.0787
				27.7693	28.4443
				25.1403	25.3123
