# Supplementary material for: Compositional editing of extracellular matrices by CRISPR/Cas9 engineering of human mesenchymal stem cell lines
Source: eLife journal article supplement (doi:10.7554/elife.96941), 2024-05-13
Supplement: data1 [file Figure 2F - Source data.xlsx]

## Sheet: Sheet1
			MSOD-B												MSOD-BΔV1
		ColX volume (μm3) Normalised to total volume	0.684	0.423	0.523										0.17	0.21	0.23
