# Supplementary material for: Compositional editing of extracellular matrices by CRISPR/Cas9 engineering of human mesenchymal stem cell lines
Source: eLife journal article supplement (doi:10.7554/elife.96941), 2024-05-13
Supplement: data1 [file Figure 2H - Source data.xlsx]

## Sheet: Sheet1
				2 Weeks		6 Weeks
				MSOD-B	MSOD-BΔV1	MSOD-B	MSOD-BΔV1
				18.7515	10.7923	22.337	18.3645
				19.7888	21.6756	29.622	16.9842
				12.8506		20.256
				23.0834	18.0576	21.578	19.2659
				13.8858	22.6502	21.246	20.2045
				16.1945	9.1457	17.17	11.7273
				17.5676	18.0996	20.684	17.7361
				14.748	13.9129
