# Supplementary material for: Compositional editing of extracellular matrices by CRISPR/Cas9 engineering of human mesenchymal stem cell lines
Source: eLife journal article supplement (doi:10.7554/elife.96941), 2024-05-13
Supplement: data1 [file Figure 3 - supplement 5 - Source data.xlsx]

## Sheet: Sheet1
	MSOD-B												MSOD-BΔR2
	36.6855	23.8476	24.4598										20.1624	20.2826	20.4943
