# Supplementary material for: Compositional editing of extracellular matrices by CRISPR/Cas9 engineering of human mesenchymal stem cell lines
Source: eLife journal article supplement (doi:10.7554/elife.96941), 2024-05-13
Supplement: data1 [file Figure 3 - supplement 7 - Source data.xlsx]

## Sheet: Sheet1
			MSOD-B												MSOD-BΔR2
		Col2 volume (%) Normalised to total volume	0.4	0.36	0.32										0.28	0.22	0.24
