# Supplementary material for: Compositional editing of extracellular matrices by CRISPR/Cas9 engineering of human mesenchymal stem cell lines
Source: eLife journal article supplement (doi:10.7554/elife.96941), 2024-05-13
Supplement: data1 [file Figure 3E - Source data.xlsx]

## Sheet: Sheet1
			MSOD-B												MSOD-BΔR1
			32.25	29.73	26.16	29.95	31.06	31.96	24.08	26.23	28.05				27.6117	23.7544	29.5403	31.1778	28.8946	28.3768	31.2686	33.0376	27.7306	29.1205	29.5403
