# Supplementary material for: Compositional editing of extracellular matrices by CRISPR/Cas9 engineering of human mesenchymal stem cell lines
Source: eLife journal article supplement (doi:10.7554/elife.96941), 2024-05-13
Supplement: data1 [file Figure 3H - Source data.xlsx]

## Sheet: Sheet1
					MSOD-B												MSOD-BΔR1
				ColX volume (μm3) Normalised to total volume	0.8	0.72	0.92										0.18	0.19	0.12
