# Supplementary material for: Compositional editing of extracellular matrices by CRISPR/Cas9 engineering of human mesenchymal stem cell lines
Source: eLife journal article supplement (doi:10.7554/elife.96941), 2024-05-13
Supplement: data1 [file Figure 4 - supplement 1 - Source data.xlsx]

## Sheet: Sheet1
	2 Weeks		6 Weeks
	MSOD-B	MSOD-BΔR1	MSOD-B	MSOD-BΔR1
	1.2522	0.04899	2.59425	0.682412
	1.85221	0.8001	3.61914	0.483872
	1.27706	0.1825	3.51384	1.09583
	1.07229	0.398		0.794803
		0.1045		1.79458
		0.25454		1.09634
		0.165295
		0.336594
		0.204292
		0.0895461
		0.230088
