# Supplementary material for: Compositional editing of extracellular matrices by CRISPR/Cas9 engineering of human mesenchymal stem cell lines
Source: eLife journal article supplement (doi:10.7554/elife.96941), 2024-05-13
Supplement: data1 [file Figure 4 - supplement 2 - Source data.xlsx]

## Sheet: Sheet1
	2 Weeks		6 Weeks
	MSOD-B	MSOD-BΔR1	MSOD-B	MSOD-BΔR1
	17.937	17.0323	19	16.75
	16.727	13.404	15.1	17.59
	16.108	16.9753	20.1	18.473
	18.8128	16.3251
	19.1348	17.6783
		17.8682
		5.174
		16.355
		13.68
		3.957
		17
