# Supplementary material for: Compositional editing of extracellular matrices by CRISPR/Cas9 engineering of human mesenchymal stem cell lines
Source: eLife journal article supplement (doi:10.7554/elife.96941), 2024-05-13
Supplement: data1 [file Figure 4 - supplement 3 - Source data.xlsx]

## Sheet: Sheet1
		Batch 1												2												3
		38.6853	34.1769	36.6492	34.8974	22.434	25.5132							25.3666	29.873	27.7248	22.9509	33.617	26.6958							34.3988	22.6967	29.88	32.54	30.11	30.84	29.95
