# Supplementary material for: Compositional editing of extracellular matrices by CRISPR/Cas9 engineering of human mesenchymal stem cell lines
Source: eLife journal article supplement (doi:10.7554/elife.96941), 2024-05-13
Supplement: data1 [file Figure 4 - supplement 4 - Source data.xlsx]

## Sheet: Sheet1
		VEGF_1
		Batch 1												2												3
		10.7391	11.7391	14.058										12.4927	12.7101	15.1449	12.3188									10.5506	10.2292	17.4593
