# Supplementary material for: Compositional editing of extracellular matrices by CRISPR/Cas9 engineering of human mesenchymal stem cell lines
Source: eLife journal article supplement (doi:10.7554/elife.96941), 2024-05-13
Supplement: data1 [file Figure 4 - supplement 5 - Source data.xlsx]

## Sheet: Sheet1
		RUNX2
		Batch 1												2												3
		27.6117	23.7544	29.5403										31.1778	28.8946	28.3768										31.2686	33.0376	27.7306	29.1205
