# Supplementary material for: Compositional editing of extracellular matrices by CRISPR/Cas9 engineering of human mesenchymal stem cell lines
Source: eLife journal article supplement (doi:10.7554/elife.96941), 2024-05-13
Supplement: data1 [file Figure 4 - supplement 6 - Source data.xlsx]

## Sheet: Sheet1
	Pellet volume
		MSOD-B			MSOD-BΔV1			MSOD-BΔR1
	Volume	18.1	17.6	17.12	24.21	21.26	22.58	22.08	18.53	23.01
