# Supplementary material for: Compositional editing of extracellular matrices by CRISPR/Cas9 engineering of human mesenchymal stem cell lines
Source: eLife journal article supplement (doi:10.7554/elife.96941), 2024-05-13
Supplement: data1 [file Figure 4B - Source data.xlsx]

## Sheet: Sheet1
					2 Weeks		6 Weeks
					MSOD-B	MSOD-BΔR1	MSOD-B	MSOD-BΔR1
					13.4058	2.8763	18.6539	4.0741
					15.4461	5.9112	23.9678	2.7508
					20.5359	10.7509	17.4818	5.9321
						8.5346
