# Supplementary material for: Compositional editing of extracellular matrices by CRISPR/Cas9 engineering of human mesenchymal stem cell lines
Source: eLife journal article supplement (doi:10.7554/elife.96941), 2024-05-13
Supplement: data1 [file Figure 5 - supplement 1 - Source data.xlsx]

## Sheet: Sheet1
MSOD-B		Living												Decellularized
		38.6853	34.1769	36.6492	34.8974	22.434	25.5132	25.3666	29.873	27.7248	22.9509	33.617	26.6958	19.3426	18.3246	14.107	19.3842	17.478	38.6153	17.6246	19.9756	14.4777	18.3262	23.4807	24.4098
		Living												Decellularized
MSOD-B RUNX2		67.4272	73.2112	59.8757	28.4256	32.1531	56.9837	59.5544	57.3051	27.6117	23.7544	29.5403		49.8863	40.6481	21.3189	36.4182	46.7009	23.2434	21.958	17.9413
