# Supplementary material for: Compositional editing of extracellular matrices by CRISPR/Cas9 engineering of human mesenchymal stem cell lines
Source: eLife journal article supplement (doi:10.7554/elife.96941), 2024-05-13
Supplement: data1 [file Figure 5 - supplement 2 - Source data.xlsx]

## Sheet: Sheet1
	MSOD-B		MSOD-B RUNX2
	Living	Decellularized	Living	Decellularized
	13365.4	188.732	27612.8	431.981
	14770.3	199.227	27829	515.994
	15215	100.499	27501.7	298.841
	16423.9	258.245	30472.8	601.788
	11087	277.327	26989.8	841.174
	11512.6	271.284	22240.5	542.933
	11839.2	389.912	33365.3
	14485.9	403.906	30546.9
	16329.2	405.496	30722.8
	15055.2
	12720.8
	13306.3
