# Supplementary material for: Compositional editing of extracellular matrices by CRISPR/Cas9 engineering of human mesenchymal stem cell lines
Source: eLife journal article supplement (doi:10.7554/elife.96941), 2024-05-13
Supplement: data1 [file Figure 5 - supplement 3 - Source data.xlsx]

## Sheet: Sheet1
	Healthy control	MSOD-B	MSOD-BΔR1
	32.1844	18.5184	10.2901
	43.0807	3.84642	12.6324
	43.4059	11.6722	13.8347
