# Supplementary material for: Compositional editing of extracellular matrices by CRISPR/Cas9 engineering of human mesenchymal stem cell lines
Source: eLife journal article supplement (doi:10.7554/elife.96941), 2024-05-13
Supplement: data1 [file Figure 5 - supplement 4 - Source data.xlsx]

## Sheet: Sheet1
	Healthy control	MSOD-B	MSOD-BΔR1
	134.65	200	175.6
	211.74	91.6	118
	219.91	110	179
