# Supplementary material for: Compositional editing of extracellular matrices by CRISPR/Cas9 engineering of human mesenchymal stem cell lines
Source: eLife journal article supplement (doi:10.7554/elife.96941), 2024-05-13
Supplement: data1 [file Figure 5D - Source data.xlsx]

## Sheet: Sheet1
		MSOD-B			MSOD-BΔR1
		31.567	20.15	3	30.07	2.03	3
