# Supplementary material for: Compositional editing of extracellular matrices by CRISPR/Cas9 engineering of human mesenchymal stem cell lines
Source: eLife journal article supplement (doi:10.7554/elife.96941), 2024-05-13
Supplement: data1 [file Figure 5E - Source data.xlsx]

## Sheet: Sheet1
		Healthy control	MSOD-B	MSOD-BΔR1
		660.193	1270	2140
		860	2116	1828
		1112.31	1620	1690
