# Supplementary material for: Compositional editing of extracellular matrices by CRISPR/Cas9 engineering of human mesenchymal stem cell lines
Source: eLife journal article supplement (doi:10.7554/elife.96941), 2024-05-13
Supplement: data1 [file Figure 5G - Source data.xlsx]

## Sheet: Sheet1
	MSOD-B			MSOD-BΔR1
	1.05446	0.915774	3	20.6761	7.88	3
